# Supplementary material for: Winner and Loser in Terms of the FTAs and the Trade War: Case Study of the Japanese Market
Source: Research Square preprint supplement (doi:10.21203/rs.3.rs-777952/v1), 2021-08-04
Supplement: Supplementary file 1 [file 75e1081a797979ca2e3eda5a.docx]

**APPENDIX**

**Appendix I: American and Chinese Trade Policy**

For the products lists[[1]](#footnote-1):

For aluminum:

- 8 March 2018: <https://www.govinfo.gov/content/pkg/FR-2018-03-15/pdf/2018-05477.pdf>;
- 22 March 2018: https://www.govinfo.gov/content/pkg/FR-2018-03-28/pdf/2018-06420.pdf
- 30 April 2018: https://www.govinfo.gov/content/pkg/FR-2018-05-07/pdf/2018-09841.pdf

For steel:

- 8 March 2018: <https://www.govinfo.gov/content/pkg/FR-2018-03-15/pdf/2018-05478.pdf>
- 22 March 2018: https://www.govinfo.gov/content/pkg/FR-2018-03-28/pdf/2018-06425.pdf
- 30 April 2018: <https://www.govinfo.gov/content/pkg/FR-2018-05-07/pdf/2018-09841.pdf>

USA-China friction[[2]](#footnote-2)

For the US:

- July 6: <https://www.govinfo.gov/content/pkg/FR-2018-06-20/pdf/2018-13248.pdf>
- August 23: <https://www.govinfo.gov/content/pkg/FR-2018-08-16/pdf/2018-17709.pdf>
- September, 24: https://www.govinfo.gov/content/pkg/FR-2018-09-21/pdf/2018-20610.pdf

For China:

- July 6: <http://gss.mof.gov.cn/zhengwuxinxi/zhengcefabu/201806/P020180616034361843828.pdf>
- August 23: <http://gss.mof.gov.cn/zhengwuxinxi/zhengcefabu/201806/P020180616034362364988.pdf>
- September, 24: http://gss.mof.gov.cn/zhengwuxinxi/zhengcefabu/201808/t20180803_2980950.html

**Appendix I1: The USA’s Trade Policy**

Source: CRS, U.S. Census Bureau, USTR, USITC

**Appendix I2: Average Tariff Rate**


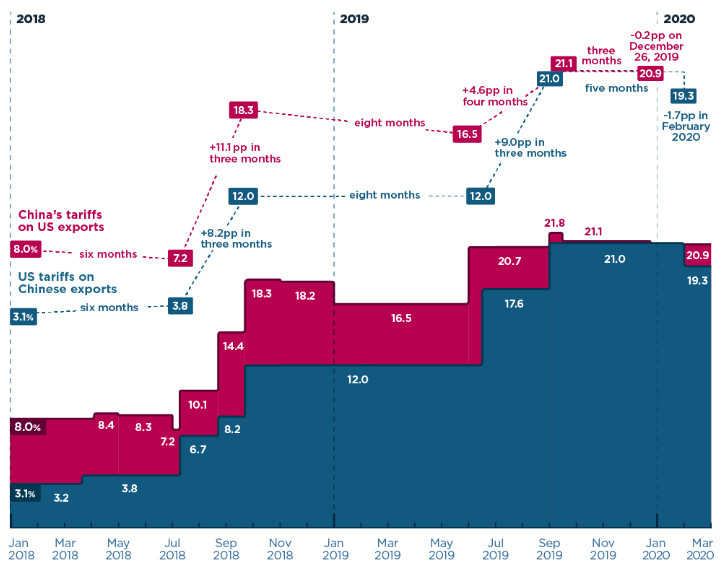


Source: CRS, U.S. Census Bureau, USTR, USITC

**Appendix I3: Average Tariff Rate of the USA[[3]](#footnote-3)**


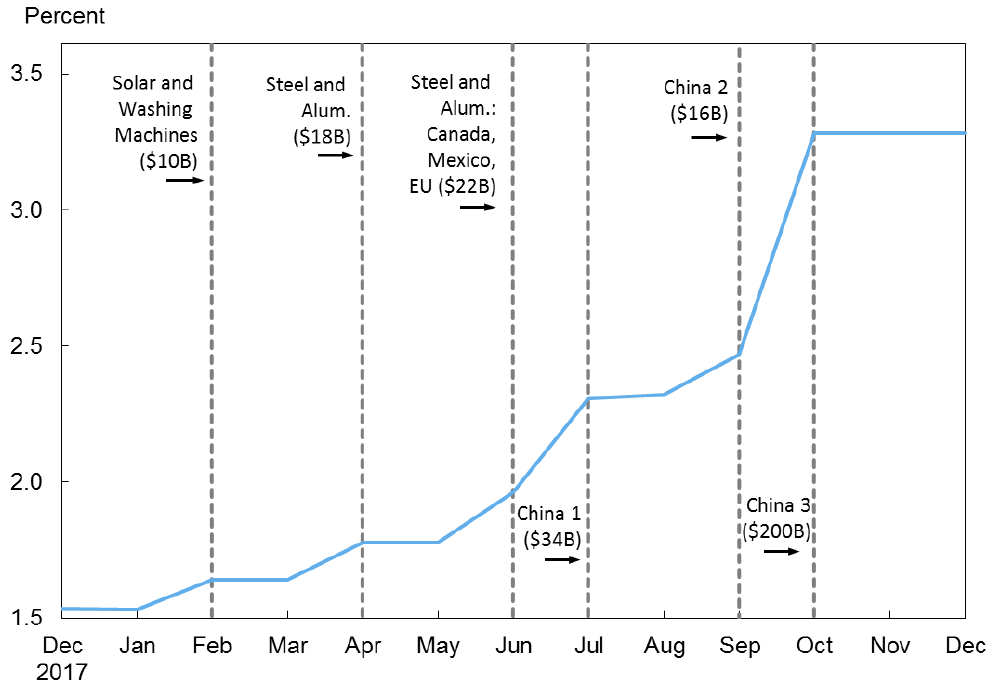


Source: Amiti et al. (2019).

**Appendix II: GTAP Output**

**Appendix II1: Each Agreement Contribution to Welfare, Percentage in Total**

**Appendix II2: Each Sectoral contribution to the countries in total**

**Appendix II3: Import Tariff and Export Subsidies**

| **Sectoral Tariff Rate** | **Japan** | | | | **EU_28** | | **USA** | |
| --- | --- | --- | --- | --- | --- | --- | --- | --- |
| **Import** | | **Export Subs.** | | **Import** | **Export Subs.** | **Import** | **Export Subs.** |
|  | **USA** | **EU_28** | **USA** | **EU_28** | **Japan** | **Japan** | **Japan** | **Japan** |
| **1 GrainsCrops** | 22 | 6 | 0 | 0 | 3 | 0 | 2 | 0 |
| **2 MeatLstk** | 35 | 46 | 0 | 0 | 2 | 0 | 3 | 0 |
| **3 Extraction** | 0 | 1 | 0 | 0 | 4 | 0 | 0 | 0 |
| **4 ProcFood** | 10 | 12 | 0 | 0 | 5 | 0 | 3 | 0 |
| **5 TextWapp** | 7 | 9 | 0 | 0 | 5 | 0 | 5 | 0 |
| **6 CmElOpMnfc** | 0 | 0 | 0 | 0 | 3 | 0 | 1 | -1 |
| **7 EEMnfc** | 0 | 0 | 0 | 0 | 6 | 0 | 1 | -1 |
| **8 MEMnfc** | 0 | 0 | 0 | 0 | 5 | 0 | 1 | -1 |
| **9 AutoMnfc** | 0 | 0 | 0 | 0 | 6 | 0 | 1 | 0 |
| **10 StlAlmMnfc** | 2 | 1 | 0 | 0 | 5 | 0 | 2 | 0 |
| **11 LightMnfc** | 1 | 4 | 0 | 0 | 5 | 0 | 1 | 0 |
| **12 HeavyMnfc** | 1 | 1 | 0 | 0 | 6 | 0 | 2 | -1 |
| **13 Util_Cons** | 0 | 0 | 0 | 0 | 0 | 0 | 0 | 0 |
| **14 TransComm** | 0 | 0 | 0 | 0 | 0 | 0 | 0 | 0 |
| **15 OthServices** | 0 | 0 | 0 | 0 | 0 | 0 | 0 | 0 |

**Appendix II4: Sectoral Aggregation**

| **Sector** | **Aggregation Label** | GTAP 10 sector |
| --- | --- | --- |
| **Paddy Rice** | **Rice** | pdr, pcr |
| **Grains and Crops** | **GrainsCrops** | wht, gro, v_f, osd, c_b, pfb, ocr |
| **Livestock and Meat Products** | **MeatLstk** | ctl, oap, rmk, wol, cmt, omt |
| **Mining and Extraction** | **Extraction** | frs, fsh, coa, oil, gas, oxt |
| **Processed Food** | **ProcFood** | vol, mil, sgr, ofd, b_t |
| **Textiles and Clothing** | **TextWapp** | tex, wap |
| **Computer, Elecronic and optic** | **CmElOpMnfc** | ele |
| **Electrical equipment** | **EEMnfc** | eeq |
| **Machinery and Equipment nec.** | **MEMnfc** | ome |
| **Automobile** | **AutoMnfc** | mvh, otn |
| **Steel and Aliminium** | **StlAlmMnfc** | i_s, nfm, fmp |
| **Light Manufacturing** | **LightMnfc** | lea, lum, ppp, omf |
| **Heavy Manufacturing** | **HeavyMnfc** | p_c, chm, bph, rpp, nmm |
| **Trade and Transport** | **TradeTransp** | trd, otp, atp |
| **Utilities and Construction** | **Util_Cons** | ely, gdt, wtr, cns |
| **Transport and Communication** | **TransComm** | afs, wtp, whs, cmn |
| **Other Services** | **OthServices** | ofi, ins, rsa, obs, ros, osg, edu, hht, dwe |

**Appendix II5: Regional Aggregation**

| **Region** | **Aggegation Label** | **GTAP10 regions** |
| --- | --- | --- |
| **Japan** | **Japan** | jpn |
| **United States of America** | **USA** | usa |
| **China** | **China** | chn, hkg |
| **Canada** | **Canada** | can |
| **Turkey** | **Turkey** | tur |
| **Mexico** | **Mexico** | mex |
| **India** | **India** | ind |
| **Russian Federation** | **Russia** | rus |
| **European Union 28** | **EU28** | Aut, bel, bgr, hrv, cyp, cze, dnk, est, fln, fra, deu, grc, hun, irl, ita, lva, ltu, lux, mlt, nld, pol, prt, rou, svk, svn, esp, swe, gbr |
| **Oceania** | **Oceania** | Aus, nzl, xoc |
| **East Asia** | **EastAsia** | Kor, mng, twn, xea, brn |
| **Southeast Asia** | **SEAsia** | Khm, idn, lao, mys, phl, sgp, tha, vnm, xse |
| **South Asia** | **SouthAsia** | Bgd, npl, pak, lka, xsa |
| **Latin America** | **LatinAmer** | Arg, bol, bra, chl, col, ecu, pry, per, ury, ven, xsm, cri, gtm, hnd, nic, pan, slv, xca, dom, jam, pri, tto, xcb |
| **The Middle East and North Africa** | **MENA** | Bhr, irn, isr, jor, kwt, omn, qat, sau, are, xws, egy, mar, tun, xnf |
| **Sub-Saharan Africa** | **SSA** | Ben, bfa, cmr, civ, gha, gin, nga, sen, tgo, xwf, xcf, xac, eth, ken, mdg, mwi, mus, moz, rwa, tza, uga, zmb, zwe, xec, bwa, nam, zaf, xsc |
| **Rest of World** | **RestofWorld** | Xna, che, nor, xef, alb, blr, ukr, xee, xer, kaz, kgz, tjk, xsu, arm, aze, geo, xtw |

1. Up-date-line: https://www.piie.com/blogs/trade-investment-policy-watch/trump-trade-war-china-date-guide [↑](#footnote-ref-1)
2. https://www.govinfo.gov/content/pkg/FR-2019-03-05/pdf/2019-03935.pdf [↑](#footnote-ref-2)
3. More information from 2019 to 2020: <https://www.piie.com/blogs/trade-investment-policy-watch/trump-trade-war-china-date-guide>. [↑](#footnote-ref-3)
